# Supplementary material for: Surface orientation effects in crystalline–amorphous silicon interfaces
Source: Royal Society of Chemistry journal article supplement (doi:10.1039/c2cp42679j), 2012-01-01
Supplement: c2cp42679j.pdf [file c2cp42679j.pdf]

# Supplementary Information for Surface Orientation Effects in Crystalline-Amorphous Silicon Interfaces

Michael Nolan\*, Merid Legesse and Giorgos Fagas\*

This SI contains the following information  
Figures S1-S3. RDF plots for all layers in the a-Si/c-Si and a-Si:H/c-Si structures for each of (100), (110) and (111) Si surfaces

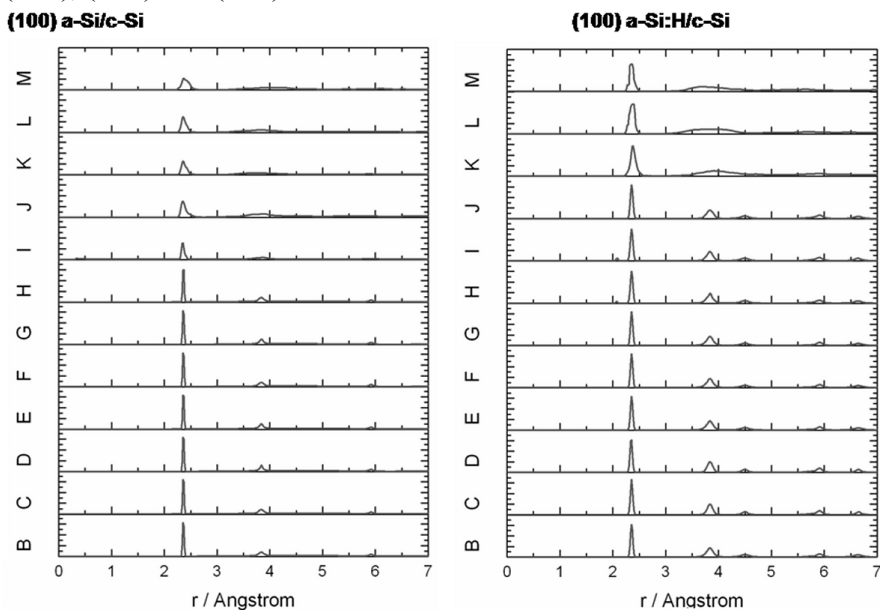

Figure S1  
(100) a-Si/c-Si

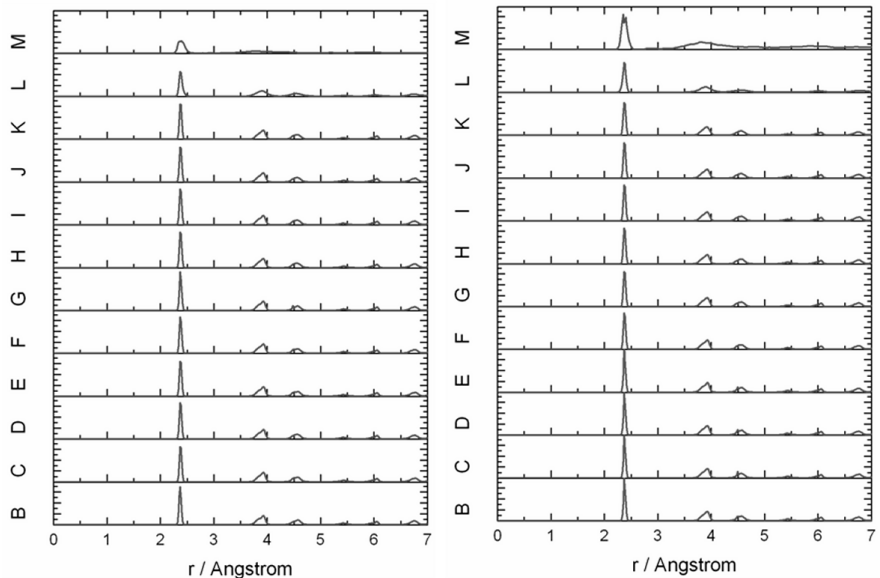

Figure S2

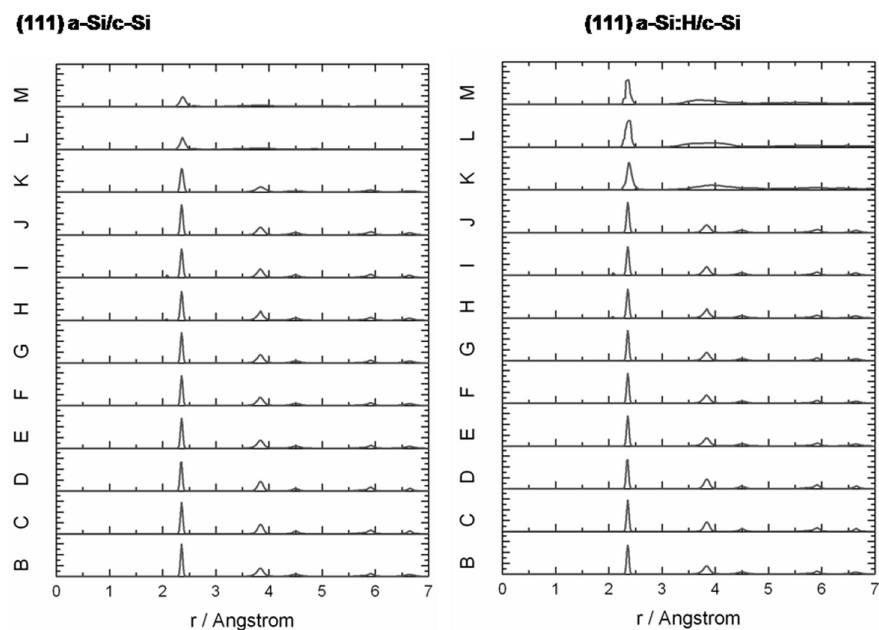

Figure S3

Figures S4-S6. Electronic DOS plots for all layers in the a-Si/c-Si and a-Si:H/c-Si structures for each of (100), (110) and (111) Si surfaces (6 plots)

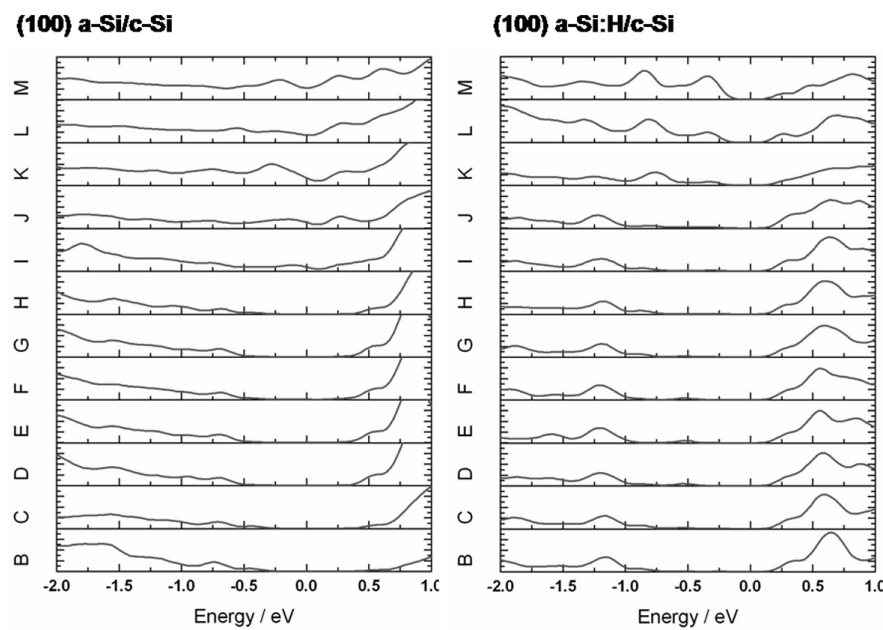

Figure S4

**(110) a-Si/c-Si**

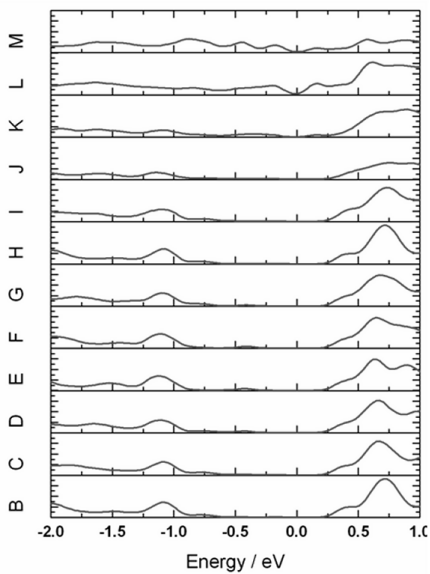

**(110) a-Si:H/c-Si**

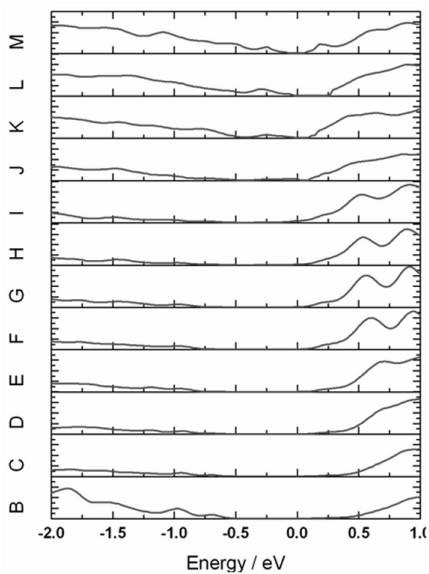

**Figure S5**

**(111) a-Si/c-Si**

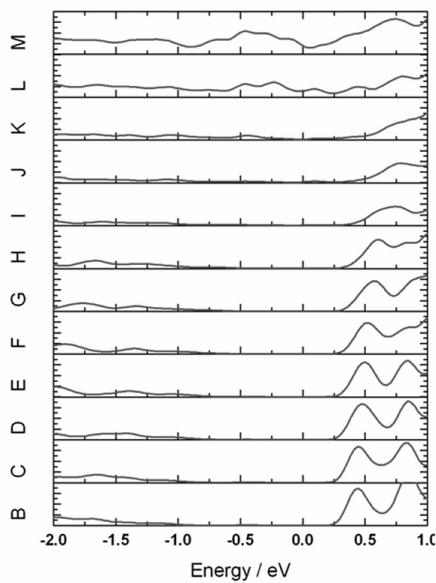

**(111) a-Si:H/c-Si**

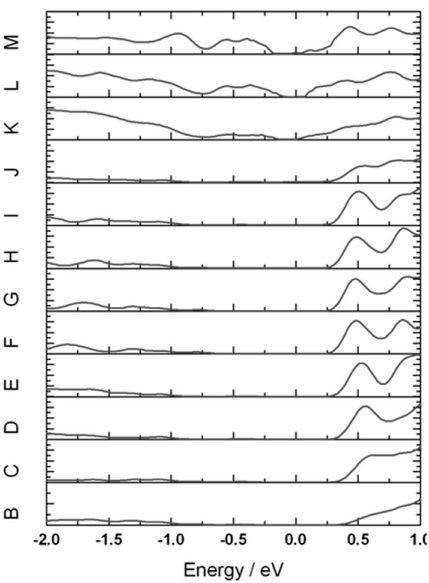

**Figure S6**
